# Supplementary material for: Accelerating Density Functional Calculation of Adatom Adsorption on Graphene via Machine Learning
Source: MDPI journal article supplement (doi:10.3390/ma16072633), 2023-03-26
Supplement: s1 [file s1]

## Supplementary Material

# Accelerating Density Functional Calculation of Adatom Adsorption on Graphene via Machine Learning

Nan Qu <sup>1,†</sup>, Mo Chen <sup>1,†</sup>, Mingqing Liao <sup>1</sup>, Yuan Cheng <sup>2</sup>, Zhonghong Lai <sup>3</sup>, Fei Zhou <sup>1</sup>,  
Jingchuan Zhu <sup>1,\*</sup>, Yong Liu <sup>1,\*</sup> and Lin Zhang <sup>4</sup>

<sup>1</sup> School of Materials Science and Engineering, Harbin Institute of Technology, Harbin 150001, China

<sup>2</sup> National Key Laboratory of Science and Technology on Advanced Composites in Special Environments, Harbin Institute of Technology, Harbin 150001, China

<sup>3</sup> Center of Analysis, Measurement and Computing, Harbin Institute of Technology, Harbin 150001, China

<sup>4</sup> Biological Physics, Department of Physics and Astronomy, University of Manchester, Oxford Road, Manchester M13 9PL, UK

\* Correspondence: fgms@hit.edu.cn (J.Z.); lyonghit@hit.edu.cn (Y.L.)

† These authors contributed equally to this work.

Supplementary Table S3. Parameters used in genetic algorithm.

|                       |     |
|-----------------------|-----|
| genetic Algebra       | 30  |
| population size       | 50  |
| crossover probability | 0.5 |
| mutation probability  | 0.2 |

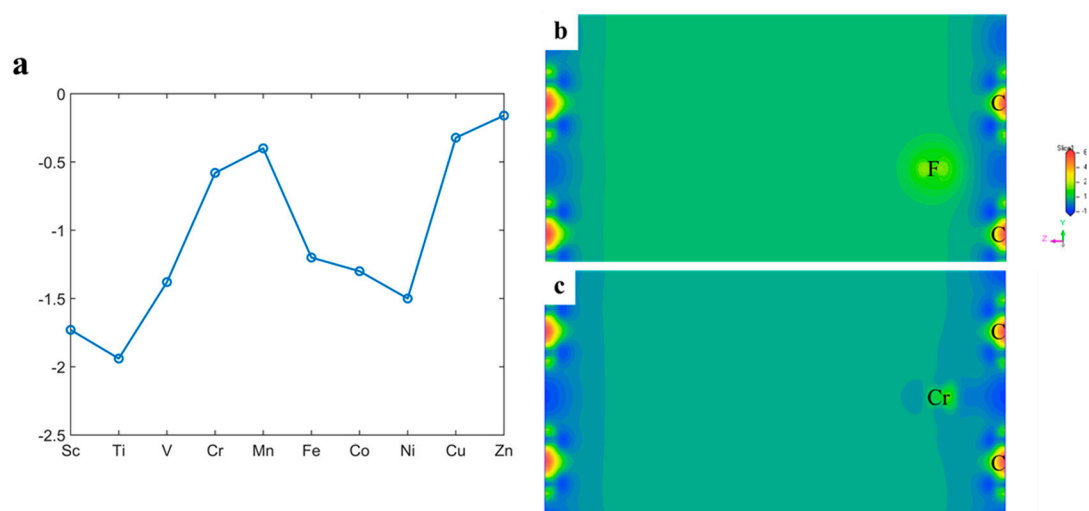

**Supplementary Figure S1.** (a) Evolution along the 3d series according to DFT prediction, and the electron density difference plots of (b) F and (c) Cr adatom adsorption on graphene.

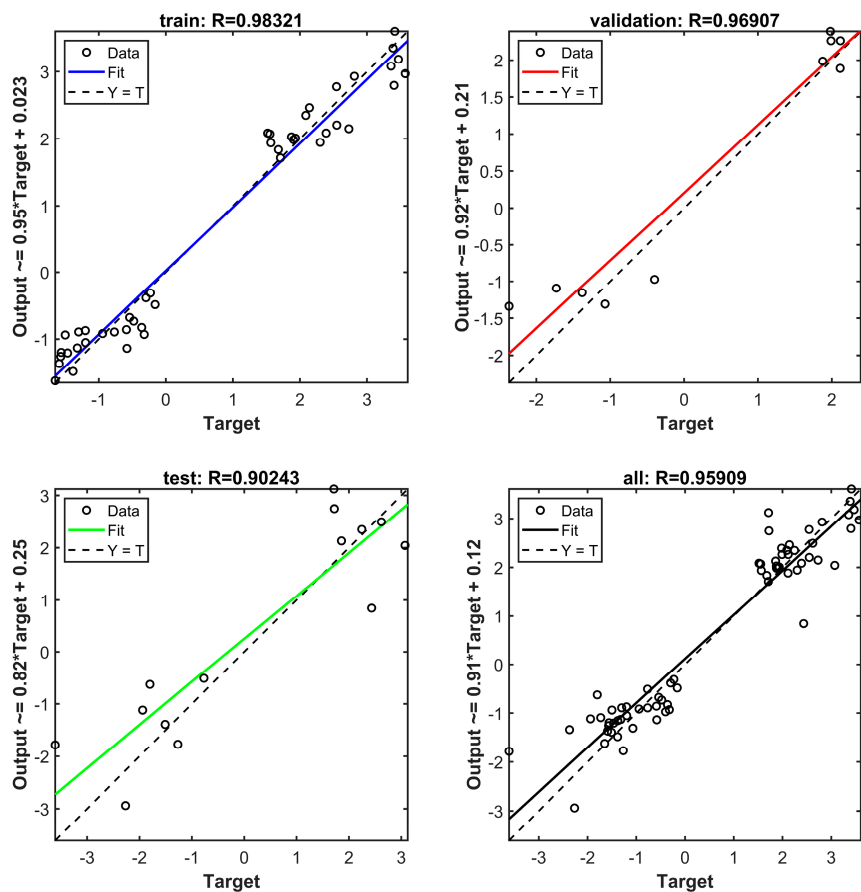

**Supplementary Figure S2.** Prediction performance plots with train, validation, test and the all dataset.

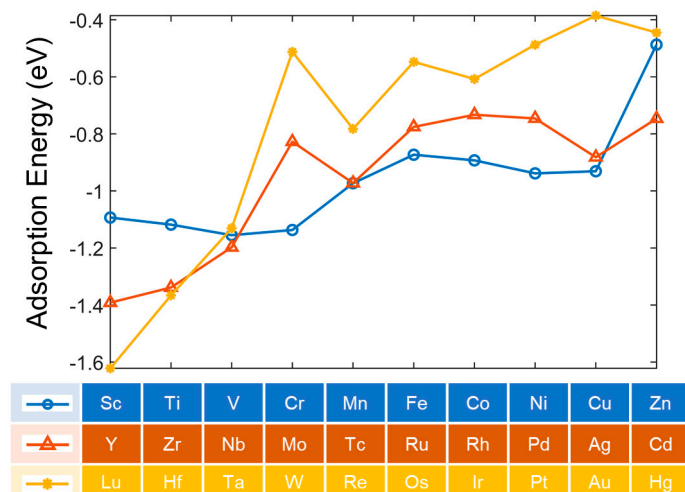

**Supplementary Figure S3.** Evolution transition metal according to ML prediction.

Supplementary Box S1.

The GGA in PBE format and the PAW method are employed. A plane wave basis with a cut-off energy of 380 eV and "3×3×1" k-sampling in Brillouin zone are used. The Graphene/Mg interfaces are shown in supplementary Figure S4. Mg atoms cut off along Mg (0 0 0 1) facet are used as the metal matrix with one graphene layer. The vacuum layers of 10 Å is used. Cohesive energy ( $E_{coh}$ ) is calculated as

$$E_{coh} = \frac{1}{a + b + c} (aE_{atom}^C + bE_{atom}^{Mg} + cE_{atom}^M - E_{total}^{Gra/Mg+M})$$

where a, b and c are the number of atoms,  $E_{atom}$  is the energy of single atom, and  $E_{total}^{Gra/Mg+M}$  is the energy of graphene/Mg+M interface.

**Supplementary Table S5.** Bond population analysis of Graphene/Mg interface. The bonds with the strongest bond strength are as follows.

| Interface      | Bond     | Population | Length (Å) |
|----------------|----------|------------|------------|
| Graphene/Mg+Al | C-Al     | --         | --         |
|                | C-Mg     | --         | --         |
|                | Mg6-Al2  | 0.11       | 2.95       |
| Graphene/Mg+Zn | C-Zn     | --         | --         |
|                | C-Mg     | --         | --         |
|                | Mg15-Zn3 | -0.20      | 2.85       |
| Graphene/Mg+Ca | C15-Ca1  | -0.07      | 2.80       |
|                | C-Mg     | --         | --         |
|                | Mg-Ca    | --         | --         |
| Graphene/Mg+Li | C-Li     | --         | --         |
|                | C-Mg     | --         | --         |
|                | Mg5-Li1  | -0.22      | 2.91       |

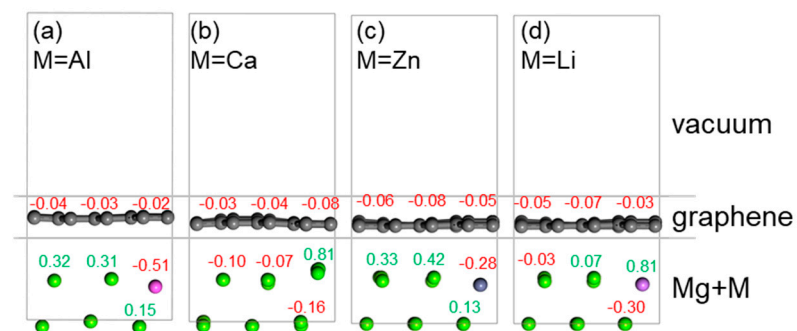

**Supplementary Figure S4.** Mulliken Population analysis of Graphene/Mg+M interfaces.



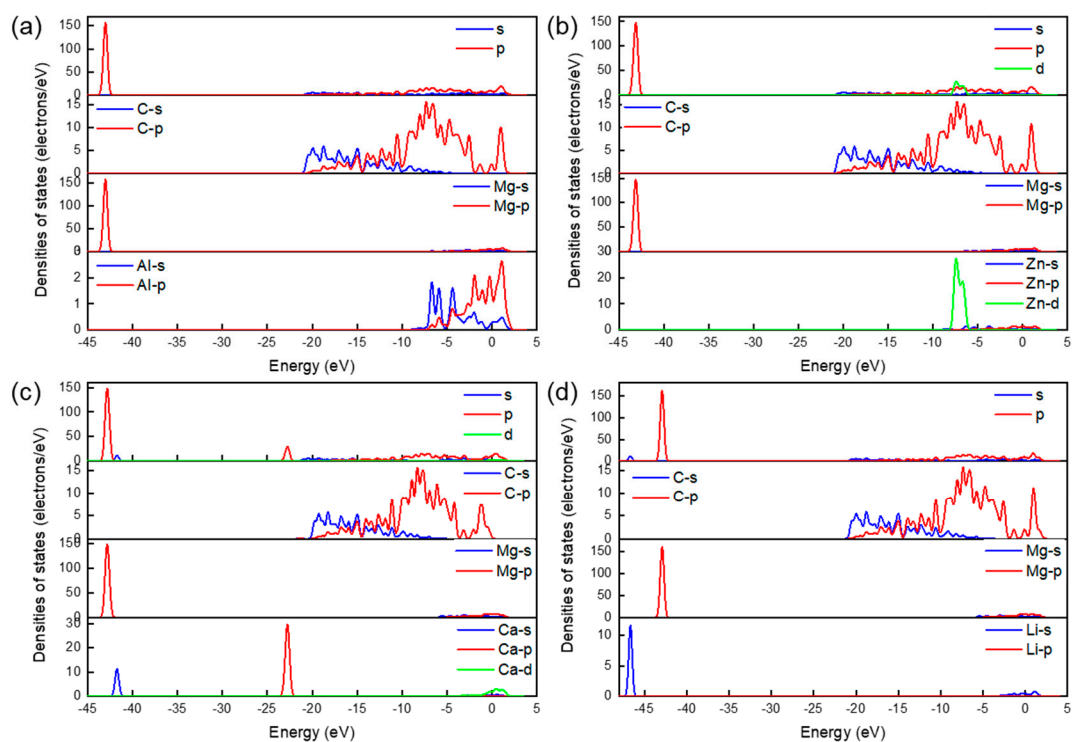

**Supplementary Figure S5.** Partial density of states (PDOS) for Graphene/Mg interface (a) Mg+Al, (b) Mg+Zn, (c) Mg+Ca and (d) Mg+Li.

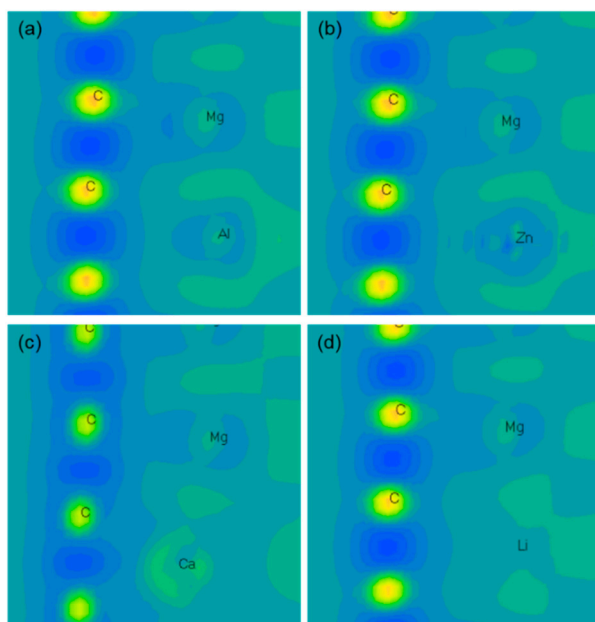

**Supplementary Figure S6.** Electron density difference of Graphene/Mg interface (a) Mg+Al, (b) Mg+Zn, (c) Mg+Ca and (d) Mg+Li.
