# Supplementary material for: Accelerating Density Functional Calculation of Adatom Adsorption on Graphene via Machine Learning
Source: Materials (Basel). 2023 Mar 26;16(7):2633. doi: 10.3390/ma16072633 (PMC10095669; doi:10.3390/ma16072633)
Supplement: Supplementary file 1 [file materials-16-02633-s001.zip › Supplementary Material_S2.xlsx]

## Sheet: brief_description
Supporting Information
Accelerating density functional calculation of adatom adsorption on graphene via machine learning
Nan Qu 1,†, Mo Chen 1,†, Mingqing Liao 1, Yuan Cheng 2, Zhonghong Lai 3, Fei Zhou 1, Jingchuan Zhu 1,*, Yong Liu 1,* and Lin Zhang 4
1 School of Materials Science and Engineering, Harbin Institute of Technology, Harbin 150001, China; qunan1967@163.com (N.Q.); lixlion@163.com (M.C.); liaomq1900127@163.com (M.L.);
2 National Key Laboratory of Science and Technology on Advanced Composites in Special Environments, Harbin Institute of Technology, Harbin 150001, China; cy6810@hit.edu.cn
3 Center of Analysis, Measurement and Computing, Harbin Institute of Technology, Harbin 150001, China; zhhlai@hit.edu.cn
4 Biological Physics, Department of Physics and Astronomy, University of Manchester, Oxford Road, Manchester M13 9PL, UK
* Correspondence: fgms@hit.edu.cn (J.Z.); lyonghit@hit.edu.cn (Y.L.)
† These authors contributed equally to this work.

## Sheet: Output_dataset
Supplementary Table S1 High-throughput DFT calculation results.
adatom	adsorption site	adsorption distance	EA/G	EA	EG	Eads
H	H	2.545	-4984.87	-12.506	-4971.78	-0.587418
Li	H	1.713	-5161.89	-188.313	-4971.78	-1.80101
B	H	1.709	-5043.94	-70.5948	-4971.78	-1.56797
N	H	3.072	-5238.43	-263.042	-4971.78	-3.61102
F	H	2.434	-5632.74	-658.694	-4971.78	-2.26723
Mg	H	3.57	-5945.16	-973.15	-4971.78	-0.23
Al	H	2.113	-5026.01	-53.16	-4971.78	-1.07
S	H	1.981	-6247.31	-1273.8	-4971.78	-1.73
Sc	H	1.858	-6572.47	-1598.75	-4971.78	-1.94
Ti	H	1.877	-6945.57	-1972.41	-4971.78	-1.38
V	H	2.093	-7437.8	-2465.45	-4971.78	-0.56796
Cr	H	2.116	-5623.75	-651.57	-4971.78	-0.4
Mn	H	1.518	-5834.98	-862	-4971.78	-1.2
Fe	H	1.552	-6012.97	-1039.89	-4971.78	-1.3
Co	H	1.565	-6325.31	-1352.03	-4971.78	-1.5
Ni	H	3.468	-6681.97	-1710.03	-4971.78	-0.16
Cu	H	2.811	-5631.9	-658.734	-4971.78	-1.38337
Zn	H	2.246	-5162.84	-189.55	-4971.78	-1.51
Ge	H	1.989	-6249.8	-1275.65	-4971.78	-2.37
Br	H	1.904	-6518.73	-1545.39	-4971.78	-1.56
Rb	H	1.678	-6903.77	-1931.63	-4971.78	-0.36
Y	H	2.729	-5064.22	-91.6701	-4971.78	-0.767455
Zr	H	3.403	-5119.34	-147.016	-4971.78	-0.540028
Nb	H	2.621	-5670.83	-697.78	-4971.78	-1.26767
Mo	H	2.39	-10745	-5771.57	-4971.78	-1.65
Rh	H	2.087	-5377.16	-403.79	-4971.78	-1.59
Sn	H	2.141	-5104.49	-131.39	-4971.78	-1.32
Sb	H	1.721	-6899.09	-1926.54	-4971.78	-0.77
Ba	H	3.414	-5883.66	-911.586	-4971.78	-0.296379
Lu	H	2.549	-5075.87	-103.148	-4971.78	-0.94295
Hf	H	3.388	-5337.21	-364.232	-4971.78	-1.1971
Ta	H	1.873	-5575.74	-603.485	-4971.78	-0.478915
W	H	3.358	-5247.37	-274.128	-4971.78	-1.46479
Au	H	1.933	-6446.83	-1474.73	-4971.78	-0.322356

## Sheet: Input_dataset
Supplementary Table S2 Atomic characteristics of elements in the entire periodic table
						Ionisation energies (kJ mol−1)			Electron configuration Code
Atom	atomic number	Atomic radius, non-bonded (Å)	Covalent radius (Å)	Van der Waals radius (Å)	Electronegativity (Pauling scale)	1st	2nd	3rd	s	p	d	f	Group	Period	Relative atomic mass	Electron affinity (kJ mol−1)
H	1	0.25	0.37	1.2	2.2	1312.05			11	0	0	0	1	1	1.008	72.769
Li	3	1.45	1.34	2.12	0.98	520.22	7298.15	11815	21	0	0	0	1	2	6.94	59.633
Be	4	1.05	0.9	1.98	1.57	899.5	1757.11	14848.8	22	0	0	0	2	2	9.012	Not stable
B	5	0.85	0.82	1.91	2.04	800.64	2427.07	3659.75	22	21	0	0	13	2	10.81	26.989
C	6	0.7	0.77	1.77	2.55	1086.45	2352.63	4620.47	22	22	0	0	14	2	12.011	121.776
N	7	0.65	0.75	1.66	3.04	1402.33	2856.09	4578.16	22	23	0	0	15	2	14.007	Not stable
O	8	0.6	0.73	1.5	3.44	1313.94	3388.67	5300.47	22	24	0	0	16	2	15.999	140.976
F	9	0.5	0.71	1.46	3.98	1681.05	3374.17	6050.44	22	25	0	0	17	2	18.998	328.165
Na	11	1.8	1.54	2.5	0.93	495.85	4562.44	6910.28	31	26	0	0	1	3	22.99	52.867
Mg	12	1.5	1.3	2.51	1.31	737.75	1450.68	7732.69	32	26	0	0	2	3	24.305	Not stable
Al	13	1.25	1.18	2.25	1.61	577.54	1816.68	2744.78	32	31	0	0	13	3	26.982	41.762
Si	14	1.1	1.11	2.19	1.9	786.52	1577.13	3231.59	32	32	0	0	14	3	28.085	134.068
P	15	1	1.06	1.9	2.19	1011.81	1907.47	2914.12	32	33	0	0	15	3	30.974	72.037
S	16	1	1.02	1.89	2.58	999.59	2251.76	3356.72	32	34	0	0	16	3	32.06	200.41
Cl	17	1	0.99	1.82	3.16	1251.19	2297.66	3821.78	32	35	0	0	17	3	35.45	348.575
K	19	2.2	1.96	2.73	0.82	418.81	3051.83	4419.61	41	36	0	0	1	4	39.098	48.385
Ca	20	1.8	1.74	2.62	1	589.83	1145.45	4912.37	42	36	0	0	2	4	40.078	2.369
Sc	21	1.6	1.44	2.58	1.36	633.09	1234.99	2388.66	42	36	301	0	3	4	44.956	18.139
Ti	22	1.4	1.36	2.46	1.54	658.81	1309.84	2652.55	42	36	302	0	4	4	47.867	7.622
V	23	1.35	1.25	2.42	1.63	650.91	1410.42	2828.08	42	36	303	0	5	4	50.942	50.655
Cr	24	1.4	1.27	2.45	1.66	652.87	1590.63	2987.19	41	36	305	0	6	4	51.996	64.259
Mn	25	1.4	1.39	2.45	1.55	717.28	1509.03	3248.47	42	36	305	0	7	4	54.938	Not stable
Fe	26	1.4	1.25	2.44	1.83	762.47	1561.88	2957.47	42	36	306	0	8	4	55.845	14.569
Co	27	1.35	1.26	2.4	1.88	760.4	1648.36	3232.3	42	36	307	0	9	4	58.933	63.873
Ni	28	1.35	1.21	2.4	1.91	737.14	1753.03	3395.32	42	36	308	0	10	4	58.693	111.537
Cu	29	1.35	1.38	2.38	1.9	745.48	1957.92	3554.62	41	36	310	0	11	4	63.546	119.159
Zn	30	1.35	1.31	2.39	1.65	906.4	1733.3	3832.69	42	36	310	0	12	4	65.38	Not stable
Ga	31	1.3	1.26	2.32	1.81	578.84	1979.41	2964.59	42	41	310	0	13	4	69.723	41.49
Ge	32	1.25	1.22	2.29	2.01	762.18	1537.46	3302.12	42	42	310	0	14	4	72.63	118.939
As	33	1.15	1.19	1.88	2.18	944.45	1793.59	2735.46	42	43	310	0	15	4	74.922	77.574
Se	34	1.15	1.16	1.82	2.55	940.96	2044.52	2973.72	42	44	310	0	16	4	78.971	194.965
Br	35	1.15	1.14	1.86	2.96	1139.86	2083.22	3473	42	45	310	0	17	4	79.904	324.537
Rb	37	2.35	2.11	3.21	0.82	403.03	2633.04	3859	51	46	310	0	1	5	85.468	46.884
Sr	38	2	1.92	2.84	0.95	549.47	1064.24	4138.26	52	46	310	0	2	5	87.62	4.631
Y	39	1.8	1.62	2.75	1.22	599.87	1179.44	1979.88	52	46	401	0	3	5	88.906	29.621
Zr	40	1.55	1.48	2.52	1.33	640.1	1264	2218.2	52	46	402	0	4	5	91.224	41.103
Nb	41	1.45	1.37	2.56	1.6	652.13	1351	2415.99	52	46	403	0	5	5	92.906	88.381
Mo	42	1.45	1.45	2.45	2.16	684.32	1559.2	2617.65	51	46	405	0	6	5	95.95	72.171
Tc	43	1.35	1.56	2.44	1.9	686.92	1472.37	2850.18	52	46	405	0	7	5	98	53.07
Ru	44	1.3	1.26	2.46	2.2	710.18	1617.09	2746.94	52	46	406	0	8	5	101.07	101.31
Rh	45	1.35	1.35	2.44	2.28	719.67	1744.45	2996.83	52	46	407	0	9	5	102.906	109.704
Pd	46	1.4	1.31	2.15	2.2	804.38	1874.71	3177.26	52	46	408	0	10	5	106.42	54.225
Ag	47	1.6	1.53	2.53	1.93	731	2072.26	3360.58	51	46	410	0	11	5	107.868	125.624
Cd	48	1.55	1.48	2.49	1.69	867.77	1631.4	3616.27	52	46	410	0	12	5	112.414	Not stable
In	49	1.55	1.44	2.43	1.78	558.3	1820.71	2704.48	52	51	410	0	13	5	114.818	28.9
Sn	50	1.45	1.41	2.42	1.96	708.58	1411.79	2943.05	52	52	410	0	14	5	118.71	107.298
Sb	51	1.45	1.38	2.47	2.05	830.58	1604.55	2441.1	52	53	410	0	15	5	121.76	100.924
Te	52	1.4	1.35	1.99	2.1	869.3	1794.6	2697.73	52	54	410	0	16	5	127.6	190.161
I	53	1.4	1.33	2.04	2.66	1008.39	1845.89	3184	52	55	410	0	17	5	126.904	295.152
Cs	55	2.6	2.25	3.48	0.79	375.7	2234.35		61	56	410	0	1	6	132.905	45.505
Ba	56	2.15	1.98	3.03	0.89	502.85	965.223		62	56	410	0	2	6	137.327	13.954
Lu	71	1.75	1.6	2.63	1.27	523.52	1341.1	2022.28	62	56	501	414	3	6	174.967	32.81
Hf	72	1.55	1.5	2.53	1.33	658.52	1447	2248.1	62	56	502	414	4	6	178.486	1.351
Ta	73	1.45	1.38	2.57	1.5	728.42			62	56	503	414	5	6	180.948	31.068
W	74	1.35	1.46	2.49	2.36	758.76	1553.4		61	56	505	414	6	6	183.84	78.757
Re	75	1.35	1.59	2.48	1.9	755.82			62	56	505	414	7	6	186.207	14.47
Os	76	1.3	1.28	2.41	2.2	814.17			62	56	506	414	8	6	190.23	106.1
Ir	77	1.35	1.37	2.29	2	865.19			62	56	507	414	9	6	192.217	150.884
Pt	78	1.35	1.28	2.32	2.28	864.4	1791.06		62	56	508	414	10	6	195.084	205.321
Au	79	1.35	1.44	2.45	2.54	890.13	1949		61	56	510	414	11	6	196.967	222.749
Hg	80	1.5	1.49	2.47	2	1007.07	1809.76	3299.8	62	56	510	414	12	6	200.592	Not stable
Tl	81	1.9	1.48	2.6	1.62	589.36	1971.03	2878.16	62	61	510	414	13	6	204.38	36.375
Pb	82	1.8	1.47	2.54	2.33	715.6	1450.41	3081.48	62	62	510	414	14	6	207.2	35.121
Bi	83	1.6	1.46	2.8	2.02	702.95	1611.6	2466.17	62	63	510	414	15	6	208.98	90.924

## Sheet: DFT_time_costs
Supplementary Table S4 Time costs of DFT calculations
model	time costs (core-hour)
H	299.653
Li	233.653
B	259.427
N	1099.54
F	71.4801
Mg	16.351
Al	149.367
S	134.777
Sc	54.4661
Ti	269.676
V	58.7927
Cr	463.809
Mn	28.0687
Fe	49.7348
Co	53.1684
Ni	36.066
Cu	535.394
Zn	46.6346
Ge	272.66
Br	150.74
Rb	401.634
Y	268.702
Zr	44.4287
Nb	365.517
Mo	954.578
Rh	1130.03
Sn	1992.18
Sb	452.735
Ba	417.033
Lu	246.91
Hf	195.126
Ta	471.527
W	296.155
Au	463.8
Graphene	15.9494
